# Supplementary material
Source: publisher figshare collection journal article supplement (https://acs.figshare.com/ndownloader/files/19828172)
Supplement: Supplementary file 1 [file 19828172]

## Supporting Information

# Living Initiator-Transfer Anionic Polymerization of Isocyanates by Sodium Diphenylamide

*Chang-Geun Chae,<sup>†</sup> In-Gyu Bak,<sup>†</sup> Yves Lansac,<sup>‡,§</sup> Shashadhar Samal,<sup>†</sup> Yun Hee Jang,<sup>\*,‡</sup> and  
Jae-Suk Lee<sup>\*,†</sup>*

<sup>†</sup>School of Materials Science and Engineering, Gwangju Institute of Science and Technology (GIST), 123 Cheomdangwagi-ro, Buk-gu, Gwangju 61005, Republic of Korea

<sup>‡</sup>Department of Energy Science and Engineering, Daegu Gyeongbuk Institute of Science and Technology (DGIST), 333 Techno Jungang-daero, Daegu 42988, Republic of Korea

<sup>§</sup>GREMAN, UMR 7347, CNRS, Université de Tours, 37200 Tours, France

E-mail: jslee@gist.ac.kr, yhjang@dgist.ac.kr; Tel: +82-62-715-2306

## S1. Experimental Section

### S1.1. Materials

All reagents were purchased from several commercial suppliers (Sigma-Aldrich, TCI, Alfa Aesar, Fisher Scientific, etc.) and used without further purification unless otherwise noted. Tetrahydrofuran (THF) was distilled over sodium naphthalenide (NaNaph) and degassed at room temperature (RT) under  $10^{-6}$  Torr. Sodium tetrphenylborate (NaBPh<sub>4</sub>) was dried at 80 °C under  $10^{-6}$  Torr for 12 h. *n*-Hexyl isocyanate (HIC), furfuryl isocyanate (FIC), and allyl isocyanate (AIC) were distilled over calcium hydride (CaH<sub>2</sub>) under reduced pressure and then redistilled over CaH<sub>2</sub> under  $10^{-6}$  Torr. NaBPh<sub>4</sub>, HIC, FIC, and AIC were appropriately diluted with dry THF and distributed in appropriate numbers of clean glass ampules equipped with break-seals under  $10^{-6}$  Torr. A mixture of an aqueous solution of 37% hydrochloric acid (HCl, 2 mL), methanol (30 mL), and THF (40 mL) was degassed and distributed in twelve clean glass ampules equipped with break-seals under  $10^{-6}$  Torr. A solution of NaNaph in THF was prepared by following the procedure detailed in our previous work.<sup>S1</sup>

### S1.2. Instruments and Analyses

Proton and carbon-13 nuclear magnetic resonance (<sup>1</sup>H and <sup>13</sup>C NMR) spectra were recorded using a JNM-ECX 400 NMR spectrometer (JEOL) in chloroform-*d* (CDCl<sub>3</sub>, 99.8 atom% D, contains 0.03 vol% tetramethylsilane (TMS)) or dimethyl sulfoxide-*d*<sub>6</sub> (DMSO-*d*<sub>6</sub>, 99.5 atom% D) at 25 °C. Number-average molecular weight ( $M_n$ ) and dispersity ( $\mathcal{D}$ ) values of polymers were measured using a size exclusion chromatography-multiangle laser light scattering (SEC-MALLS) instrument equipped with a 515 HPLC pump (Waters), a set of four Styragel columns connected in series (HR 0.5, HR 1, HR 3, and HR 4 with pore sizes of 50, 100, 500, and 1000 Å, respectively,

Waters), a miniDAWN TREOS light scattering detector (Wyatt Technology) and an Optilab T-rEX refractive index detector (Wyatt Technology). The SEC-MALLS was operated in THF:triethylamine (98:2 v:v) with an elution rate of 1.0 mL/min at 40 °C. The refractive index increment ( $dn/dc$ ) values of polymers were calculated according to the assumption of 100% mass recovery.

### S1.3. Preparation of Solutions of Sodium Diphenylamide (NaDPA) and 1:5 NaDPA:NaBPh<sub>4</sub> in THF

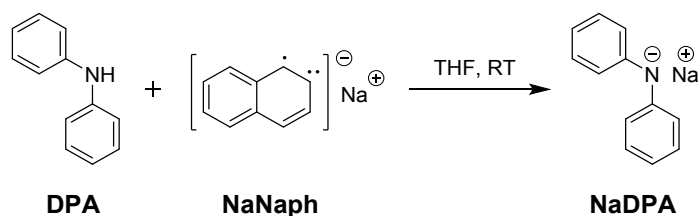

The break-seal technique was performed in a clean glass apparatus at RT under  $10^{-6}$  Torr throughout the process. Diphenylamine (DPA, 1.35 g, 8.0 mmol) was dried for 12 h in a clean glass ampule equipped with a break-seal. DPA was diluted with THF to prepare a  $0.316 \text{ mol L}^{-1}$  solution and transferred into a new clean glass ampule equipped with a break-seal. Using the break-seal technique, the DPA solution was added to a  $0.764 \text{ mol L}^{-1}$  solution of NaNaph (8.00 mmol) in THF in a clean glass apparatus. The yellowish solution of sodium diphenylamide (NaDPA) in THF was transferred into a clean glass ampule equipped with a break-seal. The solution was diluted further with THF and distributed in appropriate numbers of clean glass ampules equipped with break-seals. a  $0.205 \text{ mol L}^{-1}$  solution of NaDPA (3.14 mmol) in THF was mixed with a  $0.542 \text{ mol L}^{-1}$  solution of NaBPh<sub>4</sub> (15.7 mmol) in THF. The solutions of NaDPA and 1:5 NaDPA:NaBPh<sub>4</sub>

were further diluted with THF and distributed in appropriate numbers of clean glass ampoules equipped with break-seals.

DPA:  $^1\text{H}$  NMR (DMSO- $d_6$ , 400 MHz):  $\delta$  (ppm) 8.12 (s, 1H), 7.19 (t, 4H,  $J = 7.6$  Hz), 7.03 (d, 4H,  $J = 8.8$  Hz), 6.77 (td, 2H,  $J = 7.4, 1.2$  Hz).  $^{13}\text{C}$  NMR (DMSO- $d_6$ , 100 MHz):  $\delta$  (ppm) 143.94, 129.69, 120.16, 117.22.

#### S1.4. Acid-Base Titration to Determine the Exact Molar Concentration of NaDPA Solution

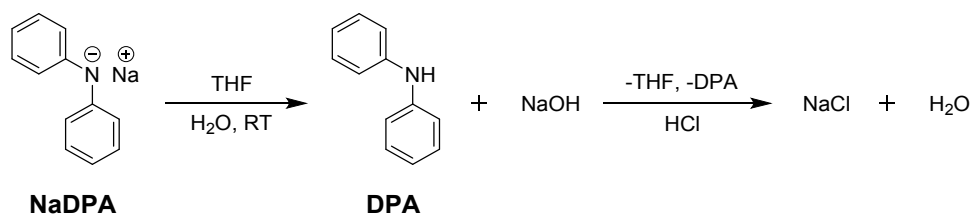

The reaction was carried out using a break-seal technique in a sealed glass reactor under  $10^{-6}$  Torr. Neutral deionized water (pH  $\approx 7.0$ , 10.0 mL) was slowly added to a  $0.103 \text{ mol L}^{-1}$  NaDPA solution (10.7 mL; the expected amount of NaDPA = 1.10 mmol) in THF at RT. After the complete reaction, the resultant alkaline solution of NaOH was concentrated under reduced pressure and filtered to remove THF and DPA, respectively. Deionized water was poured into the alkaline solution until the overall volume of the solution became 75 mL. Then, 1 mL of an aqueous solution of  $0.20 \text{ mol L}^{-1}$  HCl was repeatedly added to the alkaline aqueous solution at RT. The pH of the solution was monitored by a pH meter in real time. The actual molar concentration of NaDPA was found to be 1.01 mmol (91.8%) at the neutralization point. Thus, the molar concentration of NaDPA solution was corrected to a value of the expected molar concentration value multiplied by 0.918.

### S.1.5. Anionic Polymerization of HIC for the Kinetic Study

The anionic polymerization was carried out according to the break-seal technique in a clean glass apparatus prewashed with a solution of NaNaph in THF under  $10^{-6}$  Torr. A polymerization bath with  $-98$  °C was prepared from a mixture of methanol and liquid nitrogen. A solution of the initiator (NaDPA or 1:5 NaDPA:NaBPh<sub>4</sub>) in THF was transferred into a reaction flask and cooled to  $-98$  °C. The polymerization proceeded by adding a solution of HIC in THF to the initiator solution, in which the  $[\text{HIC}]_0$  was close to  $0.250$  mol L<sup>-1</sup>. At a particular time ( $t$ ), the polymerization was terminated by adding a solution of HCl:methanol in THF. The resulting polymer was precipitated in cool methanol, filtered, and dried under vacuum. The conversion to polymer was determined from the gravimetric yield. The methanol-soluble residues were concentrated under reduced pressure and characterized by <sup>1</sup>H NMR to calculate the conversion to cyclotrimer. The anionic polymerization of HIC finally yielded poly(*n*-hexyl isocyanate) (PHIC). The anionic polymerization with  $[\text{HIC}]_0$  near to  $0.500$  mol L<sup>-1</sup> was conducted in a bath with  $-78$  °C which was prepared from a mixture of acetone and dry ice.

PHIC with a terminal DPA residue: <sup>1</sup>H NMR (CDCl<sub>3</sub> with 0.03 vol% TMS, 400 MHz):  $\delta$  (ppm) 7.40–7.15 (br), 4.05–3.30 (br), 1.85–1.40 (br), 1.40–1.05 (br), 0.95–0.75 (br). <sup>13</sup>C NMR (CDCl<sub>3</sub> with 0.03 vol% TMS, 100 MHz):  $\delta$  (ppm) 156.83, 129.31, 127.08, 48.62, 31.57, 28.47, 26.30, 22.63, 14.03.

### S.1.6. Anionic Polymerization of FIC and AIC

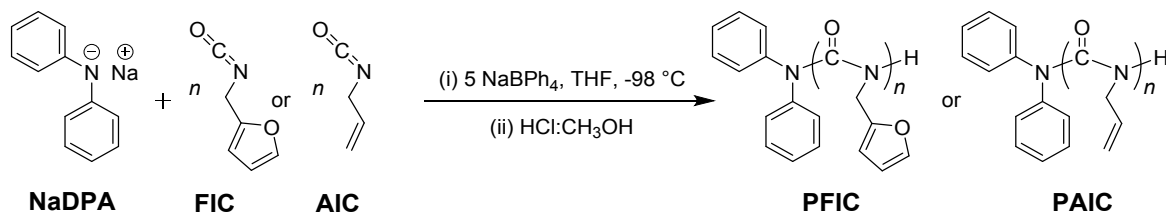

A solution of 1:5 NaPEPPA:NaBPh<sub>4</sub> in THF was transferred into a reaction flask and cooled to -98 °C. The polymerization proceeded by adding a solution of FIC or AIC in THF to the initiator solution, in which the [FIC or AIC]<sub>0</sub> was close to 0.250 mol L<sup>-1</sup>. At *t*, the polymerization was terminated by adding a solution of HCl:methanol in THF. The resulting polymer was precipitated in cool methanol, filtered, and dried under vacuum. The conversion to polymer was determined from the gravimetric yield. The methanol-soluble residues were concentrated under reduced pressure and characterized by <sup>1</sup>H NMR to calculate the conversion to cyclotrimer. The anionic polymerization of FIC and AIC finally yielded poly(furfuryl isocyanate) (PFIC) and poly(allyl isocyanate) (PAIC).

PFIC with a terminal DPA residue: <sup>1</sup>H NMR (CDCl<sub>3</sub> with 0.03 vol% TMS, 400 MHz): δ (ppm) 7.35–7.15 (br), 6.35–6.12 (br), 5.00–4.55. <sup>13</sup>C NMR (CDCl<sub>3</sub> with 0.03 vol% TMS, 100 MHz): δ (ppm) 156.67, 153.94, 149.15, 142.04, 128.77, 127.30, 110.52, 108.42, 44.91.

PAIC with a terminal DPA residue: <sup>1</sup>H NMR (CDCl<sub>3</sub> with 0.03 vol% TMS, 400 MHz): δ (ppm) 7.40–7.15 (br), 5.90–5.65 (br), 5.40–5.05 (br), 4.60–4.00 (br). <sup>13</sup>C NMR (CDCl<sub>3</sub> with 0.03 vol% TMS, 100 MHz): δ (ppm) 159.36, 153.72, 131.93, 129.31, 126.89, 116.99, 50.34.

## S2. Supplementary Data

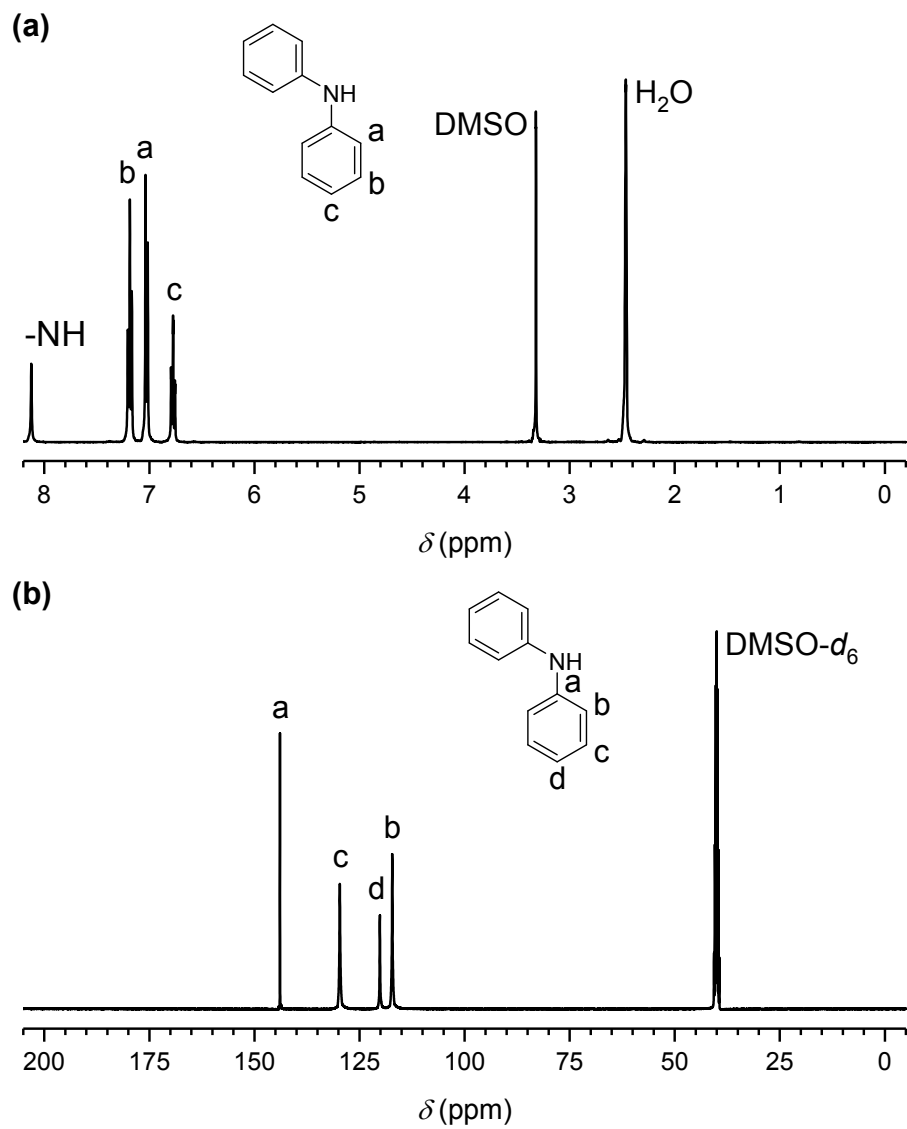

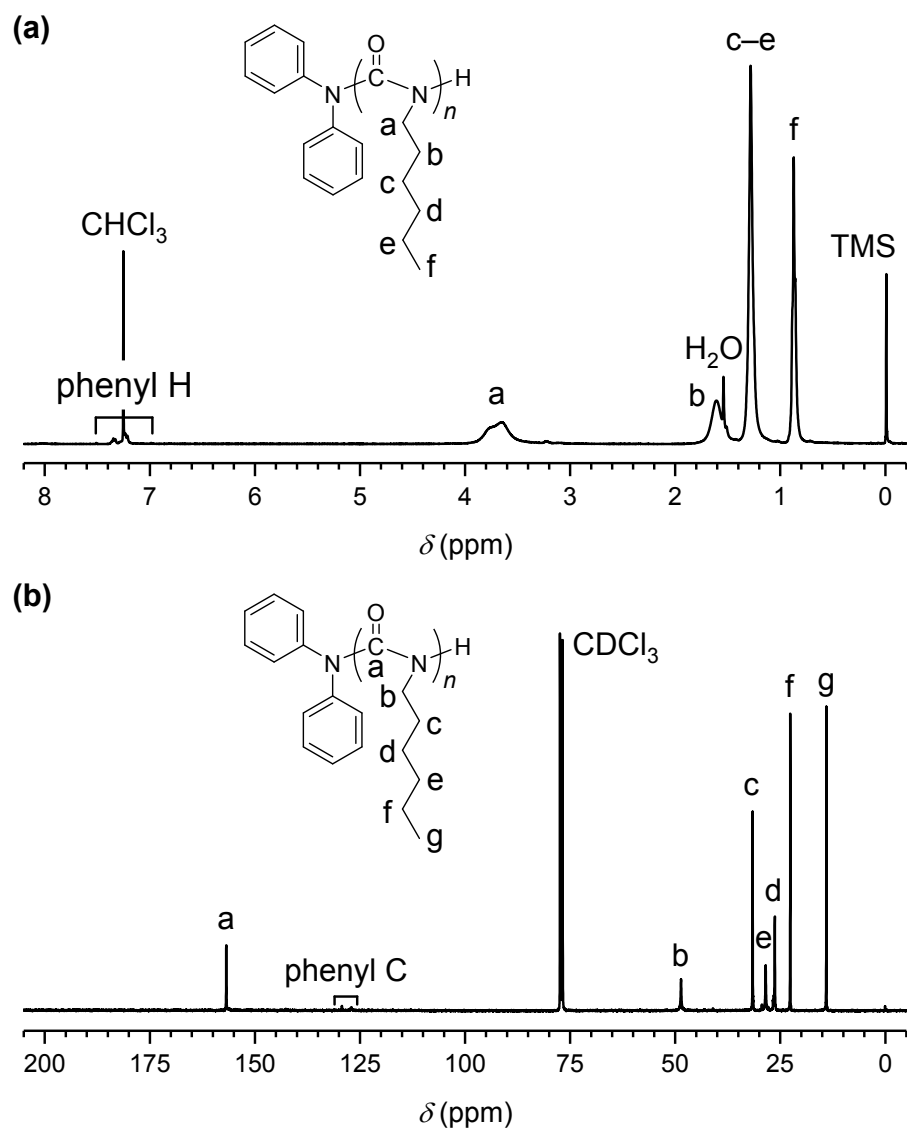

**Figure S2.** (a)  $^1\text{H}$  and (b)  $^{13}\text{C}$  NMR of PHIC with a terminal DPA residue in  $\text{CDCl}_3$ .



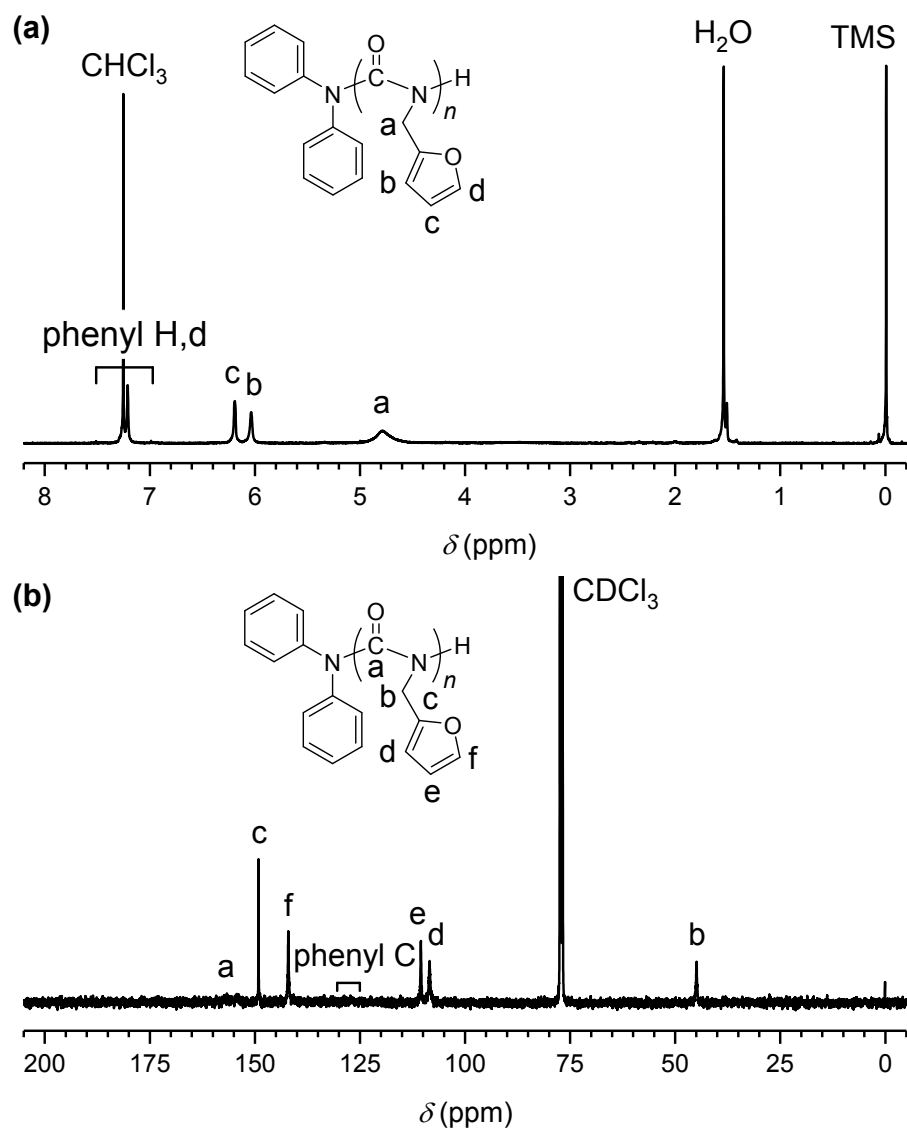

**Figure S3.** (a) <sup>1</sup>H and (b) <sup>13</sup>C NMR of PFIC with a terminal DPA residue in CDCl<sub>3</sub>.

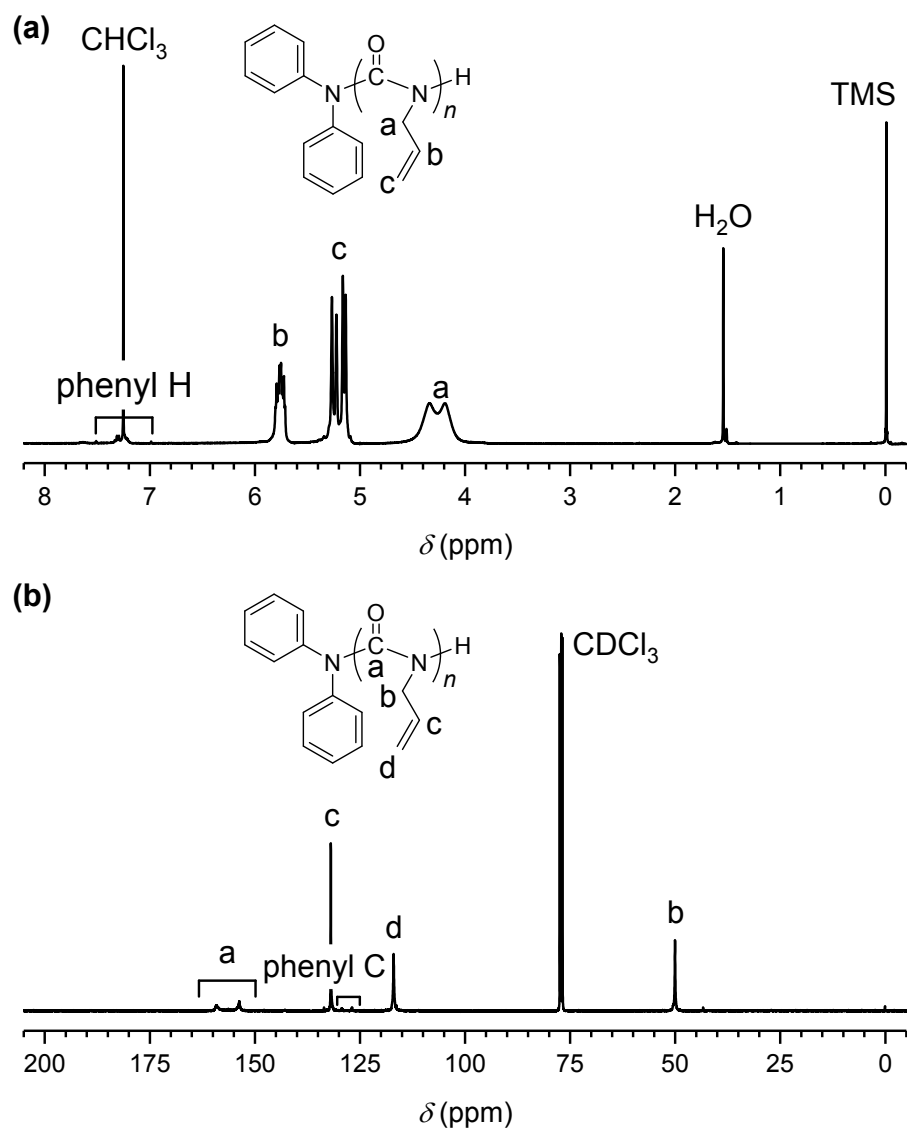

**Figure S4.** (a)  $^1\text{H}$  and (b)  $^{13}\text{C}$  NMR of PAIC with a terminal DPA residue in  $\text{CDCl}_3$ .

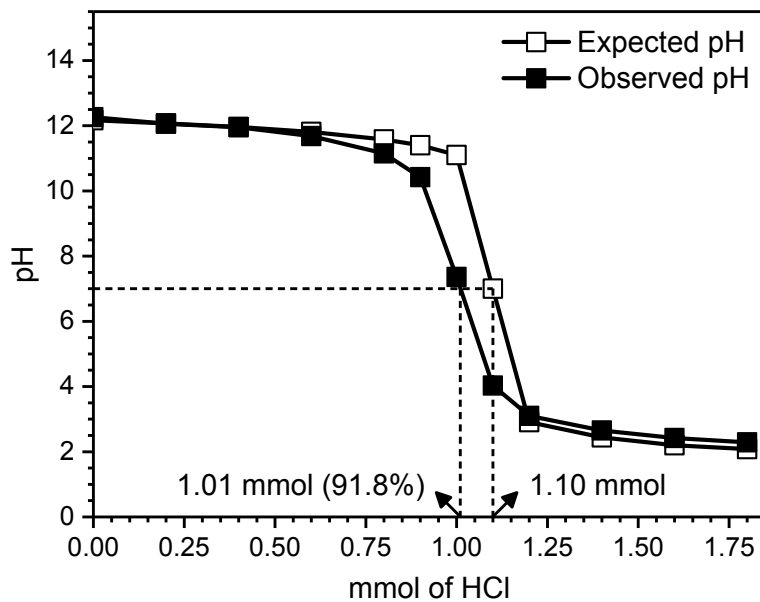

**Figure S5.** pH profile of aqueous NaOH solution converted from the NaDPA solution in THF after titration with  $0.20 \text{ mol L}^{-1}$  aqueous HCl solution.

**Table S1. Results of the Anionic Polymerization of HIC Initiated by NaDPA in the Absence of NaBPh<sub>4</sub> ([NaBPh<sub>4</sub>]<sub>0</sub>/[NaDPA]<sub>0</sub> = 0) in THF at -98 °C under 10<sup>-6</sup> Torr**

| entry | [HIC] <sub>0</sub><br>(mol L <sup>-1</sup> ) | [NaDPA] <sub>0</sub><br>(mol L <sup>-1</sup> ) | [HIC] <sub>0</sub> /<br>[NaDPA] <sub>0</sub> | <i>t</i><br>(s) | conv/%<br>P <sup>a</sup> /CT <sup>b</sup> | <i>M</i> <sub>n,theo</sub> <sup>c</sup><br>(kDa) | <i>M</i> <sub>n</sub> <sup>d</sup><br>(kDa) | <i>D</i> <sup>d</sup> | <i>f</i> <sup>e</sup> |
|-------|----------------------------------------------|------------------------------------------------|----------------------------------------------|-----------------|-------------------------------------------|--------------------------------------------------|---------------------------------------------|-----------------------|-----------------------|
| S1    | 0.251                                        | 10.8 × 10 <sup>-3</sup>                        | 23.2                                         | 60              | 81.5/0                                    | 2.57                                             | 4.62                                        | 1.15                  | 0.539                 |
| S2    | 0.251                                        | 10.8 × 10 <sup>-3</sup>                        | 23.2                                         | 150             | 95.5/0.1                                  | 2.99                                             | 4.97                                        | 1.16                  | 0.588                 |
| S3    | 0.251                                        | 10.8 × 10 <sup>-3</sup>                        | 23.2                                         | 300             | 98.6/0.3                                  | 3.08                                             | 5.05                                        | 1.17                  | 0.596                 |
| S4    | 0.248                                        | 5.39 × 10 <sup>-3</sup>                        | 46.0                                         | 60              | 73.7/0                                    | 4.48                                             | 8.85                                        | 1.11                  | 0.497                 |
| S5    | 0.248                                        | 5.39 × 10 <sup>-3</sup>                        | 46.0                                         | 150             | 91.8/0                                    | 5.54                                             | 9.54                                        | 1.16                  | 0.573                 |
| S6    | 0.248                                        | 5.39 × 10 <sup>-3</sup>                        | 46.0                                         | 300             | 96.5/0                                    | 5.81                                             | 9.67                                        | 1.17                  | 0.594                 |
| S7    | 0.248                                        | 5.39 × 10 <sup>-3</sup>                        | 46.0                                         | 600             | 98.2/0.1                                  | 5.91                                             | 9.80                                        | 1.17                  | 0.596                 |
| S8    | 0.252                                        | 3.10 × 10 <sup>-3</sup>                        | 81.3                                         | 60              | 62.0/0                                    | 6.58                                             | 15.1                                        | 1.11                  | 0.429                 |
| S9    | 0.252                                        | 3.10 × 10 <sup>-3</sup>                        | 81.3                                         | 150             | 85.6/0                                    | 9.02                                             | 16.8                                        | 1.14                  | 0.532                 |
| S10   | 0.252                                        | 3.10 × 10 <sup>-3</sup>                        | 81.3                                         | 300             | 94.5/0                                    | 9.94                                             | 17.2                                        | 1.13                  | 0.574                 |
| S11   | 0.252                                        | 3.10 × 10 <sup>-3</sup>                        | 81.3                                         | 600             | 97.6/0                                    | 10.3                                             | 17.3                                        | 1.13                  | 0.591                 |
| S12   | 0.252                                        | 3.10 × 10 <sup>-3</sup>                        | 81.3                                         | 900             | 98.0/0                                    | 10.3                                             | 17.4                                        | 1.12                  | 0.588                 |

<sup>a</sup>Conversion to polymer determined from the gravimetric yield of polymer. <sup>b</sup>Conversion to cyclotrimer determined from <sup>1</sup>H NMR. <sup>c</sup>*M*<sub>n,theo</sub> = MW of DPA + [HIC]<sub>0</sub>/[NaDPA]<sub>0</sub> × MW of HIC × conv to polymer/100%. <sup>d</sup>Determined from SEC-MALLS. <sup>e</sup>*f* = (*M*<sub>n,theo</sub> of polymer - MW of DPA)/(*M*<sub>n</sub> of polymer - MW of DPA).

**Table S2. Results of the Anionic Polymerization of HIC Initiated by NaDPA in the Presence of NaBPh<sub>4</sub> ([NaBPh<sub>4</sub>]<sub>0</sub>/[NaDPA]<sub>0</sub> = 5) in THF at -98 °C under 10<sup>-6</sup> Torr**

| entry | [HIC] <sub>0</sub><br>(mol L <sup>-1</sup> ) | [NaDPA] <sub>0</sub><br>(mol L <sup>-1</sup> ) | [HIC] <sub>0</sub> /<br>[NaDPA] <sub>0</sub> | <i>t</i><br>(s) | conv/%<br>P <sup>a</sup> /CT <sup>b</sup> | <i>M</i> <sub>n,theo</sub> <sup>c</sup><br>(kDa) | <i>M</i> <sub>n</sub> <sup>d</sup><br>(kDa) | <i>D</i> <sup>d</sup> | <i>f</i> <sup>e</sup> |
|-------|----------------------------------------------|------------------------------------------------|----------------------------------------------|-----------------|-------------------------------------------|--------------------------------------------------|---------------------------------------------|-----------------------|-----------------------|
| S18   | 0.247                                        | 10.9 × 10 <sup>-3</sup>                        | 22.7                                         | 300             | 72.2/0                                    | 2.25                                             | 4.53                                        | 1.06                  | 0.477                 |
| S19   | 0.247                                        | 10.9 × 10 <sup>-3</sup>                        | 22.7                                         | 600             | 92.8/0                                    | 2.85                                             | 5.77                                        | 1.07                  | 0.479                 |
| S20   | 0.247                                        | 10.9 × 10 <sup>-3</sup>                        | 22.7                                         | 900             | 98.1/0                                    | 3.00                                             | 6.09                                        | 1.07                  | 0.478                 |
| S21   | 0.247                                        | 5.52 × 10 <sup>-3</sup>                        | 44.7                                         | 300             | 61.9/0                                    | 3.69                                             | 7.47                                        | 1.14                  | 0.482                 |
| S22   | 0.247                                        | 5.52 × 10 <sup>-3</sup>                        | 44.7                                         | 600             | 84.7/0                                    | 4.98                                             | 10.0                                        | 1.14                  | 0.489                 |
| S23   | 0.247                                        | 5.52 × 10 <sup>-3</sup>                        | 44.7                                         | 900             | 94.4/0                                    | 5.54                                             | 11.0                                        | 1.15                  | 0.496                 |
| S24   | 0.247                                        | 5.52 × 10 <sup>-3</sup>                        | 44.7                                         | 1200            | 97.8/0                                    | 5.73                                             | 11.4                                        | 1.15                  | 0.495                 |
| S25   | 0.258                                        | 2.81 × 10 <sup>-3</sup>                        | 91.8                                         | 300             | 47.0/0                                    | 5.66                                             | 11.5                                        | 1.16                  | 0.485                 |
| S26   | 0.258                                        | 2.81 × 10 <sup>-3</sup>                        | 91.8                                         | 600             | 71.9/0                                    | 8.56                                             | 17.5                                        | 1.11                  | 0.484                 |
| S27   | 0.258                                        | 2.81 × 10 <sup>-3</sup>                        | 91.8                                         | 1200            | 92.3/0                                    | 10.9                                             | 22.3                                        | 1.13                  | 0.485                 |
| S28   | 0.258                                        | 2.81 × 10 <sup>-3</sup>                        | 91.8                                         | 1800            | 97.8/0                                    | 11.6                                             | 23.6                                        | 1.13                  | 0.488                 |
| S29   | 0.248                                        | 1.33 × 10 <sup>-3</sup>                        | 186                                          | 600             | 19.4/0                                    | 4.76                                             | 23.2                                        | 1.55                  | 0.199                 |
| S30   | 0.248                                        | 1.33 × 10 <sup>-3</sup>                        | 186                                          | 1200            | 58.1/0                                    | 13.9                                             | 41.1                                        | 1.11                  | 0.335                 |
| S31   | 0.248                                        | 1.33 × 10 <sup>-3</sup>                        | 186                                          | 1800            | 80.6/0                                    | 19.2                                             | 56.5                                        | 1.11                  | 0.338                 |
| S32   | 0.248                                        | 1.33 × 10 <sup>-3</sup>                        | 186                                          | 2400            | 90.7/0                                    | 21.6                                             | 63.8                                        | 1.16                  | 0.337                 |
| S33   | 0.498                                        | 2.68 × 10 <sup>-3</sup>                        | 186                                          | 2400            | 99.4/0                                    | 23.7                                             | 47.8                                        | 1.16                  | 0.494                 |

<sup>a</sup>Conversion to polymer determined from the gravimetric yield of polymer. <sup>b</sup>Conversion to cyclotrimer determined from <sup>1</sup>H NMR. <sup>c</sup>*M*<sub>n,theo</sub> = MW of DPA + [HIC]<sub>0</sub>/[NaDPA]<sub>0</sub> × MW of HIC × conv to polymer/100%. <sup>d</sup>Determined from SEC-MALLS. *f* = (*M*<sub>n,theo</sub> of polymer – MW of DPA)/(*M*<sub>n</sub> of polymer – MW of DPA).

(a)  $[\text{HIC}]_0/[\text{NaDPA}]_0 = 23.2$  ( $[\text{HIC}]_0 = 0.251 \text{ mol L}^{-1}$ ;  $[\text{NaDPA}]_0 = 10.8 \times 10^{-3} \text{ mol L}^{-1}$ )

$t$  (conv to polymer)  
- - - - 60 s (81.5%)  
- - - 150 s (95.5%)  
— 300 s (98.6%)

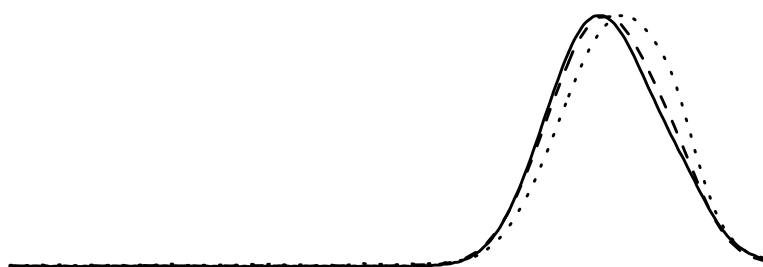

(b)  $[\text{HIC}]_0/[\text{NaDPA}]_0 = 46.0$  ( $[\text{HIC}]_0 = 0.248 \text{ mol L}^{-1}$ ;  $[\text{NaDPA}]_0 = 5.39 \times 10^{-3} \text{ mol L}^{-1}$ )

$t$  (conv to polymer)  
- - - - 60 s (73.7%)  
- - - 150 s (91.8%)  
- - - 300 s (96.5%)  
— 600 s (98.2%)

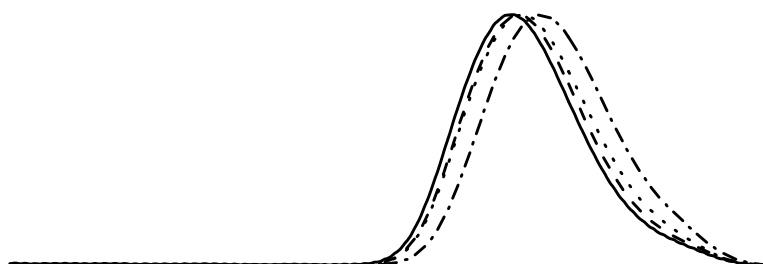

(c)  $[\text{HIC}]_0/[\text{NaDPA}]_0 = 81.3$  ( $[\text{HIC}]_0 = 0.252 \text{ mol L}^{-1}$ ;  $[\text{NaDPA}]_0 = 3.10 \times 10^{-3} \text{ mol L}^{-1}$ )

$t$  (conv to polymer)  
- - - - 60 s (62.0%)  
- - - 150 s (85.6%)  
- - - 300 s (94.5%)  
- - - 600 s (97.6%)  
— 900 s (98.0%)

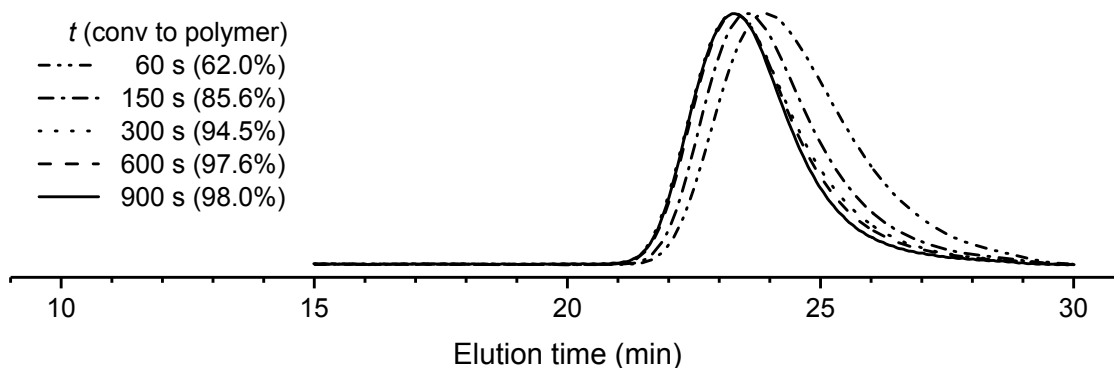

**Figure S6.** SEC-dRI traces of PHICs yielded from the anionic polymerization of HIC initiated by NaDPA in the absence of NaBPh<sub>4</sub> ( $[\text{NaBPh}_4]_0/[\text{NaDPA}]_0 = 0$ ) in THF at  $-98 \text{ }^\circ\text{C}$  under  $10^{-6}$  Torr.  $[\text{HIC}]_0/[\text{NaDPA}]_0 =$  (a) 23.2, (b) 46.0, and (c) 81.3.

(a)  $[\text{HIC}]_0/[\text{NaDPA}]_0 = 22.7$  ( $[\text{HIC}]_0 = 0.247 \text{ mol L}^{-1}$ ;  $[\text{NaDPA}]_0 = 10.9 \times 10^{-3} \text{ mol L}^{-1}$ )

$t$  (conv to polymer)  
- - - 300 s (72.2%)  
- - - 600 s (92.8%)  
— 900 s (98.1%)

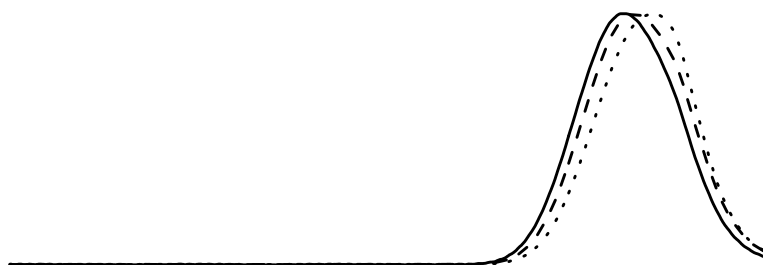

(b)  $[\text{HIC}]_0/[\text{NaDPA}]_0 = 44.7$  ( $[\text{HIC}]_0 = 0.247 \text{ mol L}^{-1}$ ;  $[\text{NaDPA}]_0 = 5.52 \times 10^{-3} \text{ mol L}^{-1}$ )

$t$  (conv to polymer)  
- - - 300 s (61.9%)  
- - - 600 s (84.7%)  
- - - 900 s (94.4%)  
— 1200 s (97.8%)

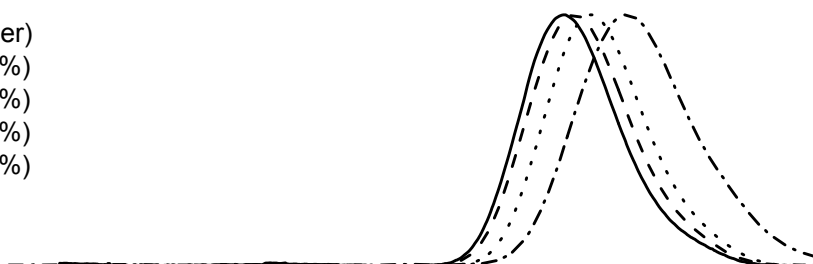

(c)  $[\text{HIC}]_0/[\text{NaDPA}]_0 = 91.8$  ( $[\text{HIC}]_0 = 0.258 \text{ mol L}^{-1}$ ;  $[\text{NaDPA}]_0 = 2.81 \times 10^{-3} \text{ mol L}^{-1}$ )

$t$  (conv to polymer)  
- - - 300 s (47.0%)  
- - - 600 s (71.9%)  
- - - 900 s (92.3%)  
— 1200 s (97.8%)

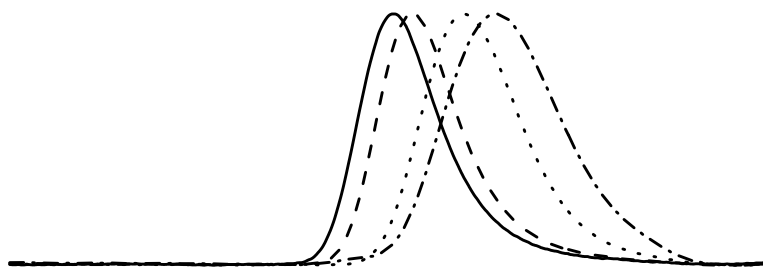

(d)  $[\text{HIC}]_0/[\text{NaDPA}]_0 = 186$  ( $[\text{HIC}]_0 = 0.248 \text{ mol L}^{-1}$ ;  $[\text{NaDPA}]_0 = 1.33 \times 10^{-3} \text{ mol L}^{-1}$ )

$t$  (conv to polymer)  
- - - 600 s (19.4%)  
- - - 1200 s (58.1%)  
- - - 1800 s (80.6%)  
— 2400 s (90.7%)

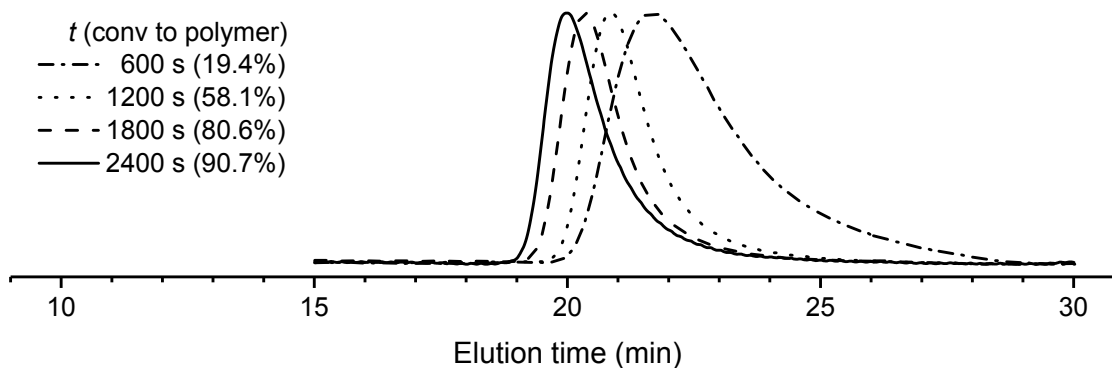

**Figure S7.** SEC-dRI traces of PHICs yielded from the anionic polymerization of HIC initiated by NaDPA in the presence of NaBPh<sub>4</sub> ( $[\text{NaBPh}_4]_0/[\text{NaDPA}]_0 = 5$ ) in THF at  $-98 \text{ }^\circ\text{C}$  under  $10^{-6}$  Torr.  $[\text{HIC}]_0/[\text{NaDPA}]_0 =$  (a) 22.7, (b) 44.7, (c) 91.8, and (d) 186.

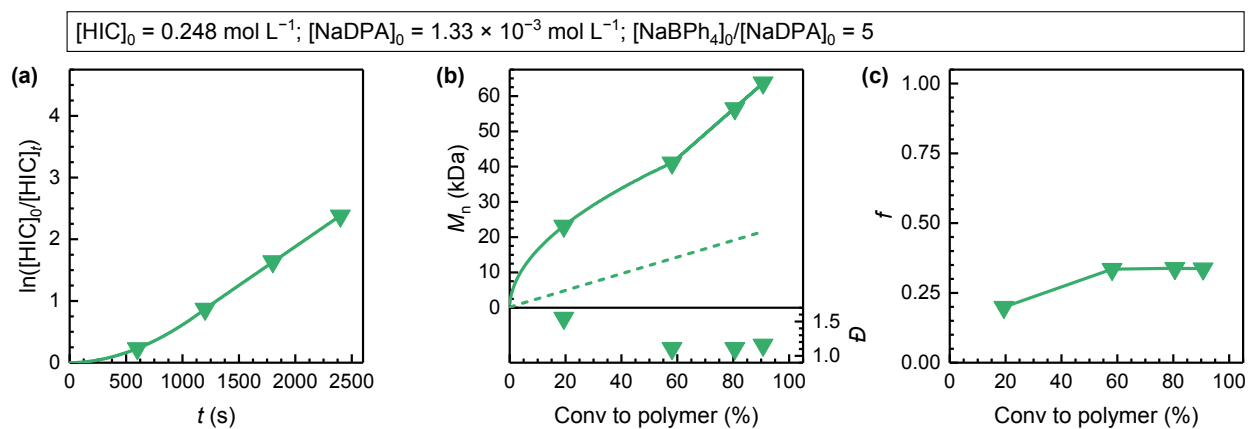

**Figure S8.** Kinetics profiles for the anionic polymerizations of HIC initiated by NaDPA in the presence of NaBPh<sub>4</sub> ( $[\text{NaBPh}_4]_0/[\text{NaDPA}]_0 = 5$ ) in THF at  $-98 \text{ }^\circ\text{C}$  under  $10^{-6}$  Torr: (a) plot of  $\ln([\text{HIC}]_0/[\text{HIC}]_t)$  versus  $t$ , (b) plots of  $M_n$  and  $D$  of PHIC versus conversion to polymer (a linear fit of  $M_{n,\text{theo}}$  against conversion to polymer is displayed as a dashed line), and (c) plot of  $f$  versus conversion to polymer.



**Table S3. Free Energy Components in THF at -98 °C (See the Reference S2 for the Equations)**

| (kcal mol <sup>-1</sup> )          | $-T\Delta S_{\text{trans}}$ | $\Delta H_{\text{rot}}$ | $-T\Delta S_{\text{rot}}$ | $\Delta\Delta G_{0\rightarrow 175\text{K}}$ | $\Delta E_{\text{g,OK}}$ | $\Delta G_{\text{solv}}$ | $\Delta G_{\text{THF,175K}}$ |
|------------------------------------|-----------------------------|-------------------------|---------------------------|---------------------------------------------|--------------------------|--------------------------|------------------------------|
|                                    | (1)                         | (2)                     | (3)                       | (4) <sup>a</sup>                            | (5)                      | (6)                      | (7) <sup>b</sup>             |
| Na <sup>+</sup>                    | -4.3                        | 0.000                   | 0.0                       | -3.4                                        | -101711.4                | -96.8                    | -101810.6                    |
| DPA <sup>-</sup>                   | -5.3                        | 0.522                   | -5.2                      | -9.1                                        | -325177.3                | -42.9                    | -325228.2                    |
| NaDPA                              | -5.4                        | 0.522                   | -5.3                      | -9.3                                        | -427013.6                | -27.4                    | -427049.2                    |
| (NaDPA) <sub>2</sub>               | -5.8                        | 0.522                   | -6.0                      | -10.4                                       | -854070.6                | -21.1                    | -854101.0                    |
| (NaDPA) <sub>3</sub>               | -6.0                        | 0.522                   | -6.4                      | -11.0                                       | -1281119.9               | -16.9                    | -1281146.7                   |
| (NaDPA) <sub>4</sub>               | -6.1                        | 0.522                   | -6.7                      | -11.4                                       | -1708162.4               | -25.0                    | -1708197.8                   |
| HIC                                | -5.2                        | 0.522                   | -4.9                      | -8.7                                        | -253937.1                | 0.2                      | -253944.5                    |
| DPA(HIC)Na                         | -5.7                        | 0.522                   | -6.0                      | -10.2                                       | -680972.3                | -23.1                    | -681004.6                    |
| {DPA(HIC)Na} <sub>2</sub> •(NaDPA) | -5.9                        | 0.522                   | -6.4                      | -10.9                                       | -1108032.8               | -14.8                    | -1108057.5                   |

<sup>a</sup>(4) =  $\Delta H_{\text{trans}}$  (= 0.87) + (1) + (2) + (3). <sup>b</sup>(7) = (4) + (5) + (6) +  $\Delta G_{\text{solv,cor}}$  (= 1.08).

**Table S3 (Continued). Equations Used to Calculate Free Energy Changes During the Chemical Transformations Involving (NaDPA)<sub>N</sub> (N = 1 to 4), HIC, DPA(HIC)Na, and {DPA(HIC)Na}•(NaDPA) in THF at –98 °C (See Above for ΔG<sub>THF,175K</sub> Values)**

(1) Self-association of NaDPA

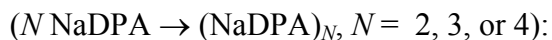

$$\Delta\Delta G_{\text{SA}} = \Delta G_{\text{THF},175\text{K}}((\text{NaDPA})_N) - N \Delta G_{\text{THF},175\text{K}}(\text{NaDPA}) \quad (\text{S1})$$

(2) Initiation reaction of (NaDPA)<sub>2</sub> with HIC

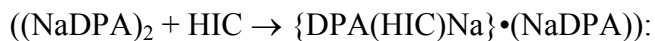

$$\begin{aligned} \Delta\Delta G_{\text{init}} = & \Delta G_{\text{THF},175\text{K}}(\{\text{DPA(HIC)Na}\} \bullet (\text{NaDPA})) \\ & - \Delta G_{\text{THF},175\text{K}}((\text{NaDPA})_2) - \Delta G_{\text{THF},175\text{K}}(\text{HIC}) \end{aligned} \quad (\text{S2})$$

(3) Cross-association of NaDPA with DPA(HIC)Na

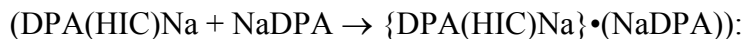

$$\begin{aligned} \Delta\Delta G_{\text{CA}} = & \Delta G_{\text{THF},175\text{K}}(\{\text{DPA(HIC)Na}\} \bullet (\text{NaDPA})) \\ & - \Delta G_{\text{THF},175\text{K}}(\text{DPA(HIC)Na}) - \Delta G_{\text{THF},175\text{K}}(\text{NaDPA}) \end{aligned} \quad (\text{S3})$$

**Table S4. Final Results of the Anionic Polymerization of Functional Isocyanates Initiated by NaDPA in the Presence of NaBPh<sub>4</sub> ([NaBPh<sub>4</sub>]<sub>0</sub>/[NaDPA]<sub>0</sub> = 5) in THF at -98 °C under 10<sup>-6</sup> Torr**

| entry | M   | [M] <sub>0</sub><br>(mol L <sup>-1</sup> ) | [NaDPA] <sub>0</sub><br>(mol L <sup>-1</sup> ) | [M] <sub>0</sub> /<br>[NaDPA] <sub>0</sub> | <i>t</i><br>(s) | conv/%<br>(P <sup>a</sup> /CT <sup>b</sup> ) | <i>M</i> <sub>n,theo</sub> <sup>c</sup><br>(kDa) | <i>M</i> <sub>n</sub> <sup>d</sup><br>(kDa) | <i>D</i> <sup>d</sup> | <i>f</i> <sup>e</sup> |
|-------|-----|--------------------------------------------|------------------------------------------------|--------------------------------------------|-----------------|----------------------------------------------|--------------------------------------------------|---------------------------------------------|-----------------------|-----------------------|
| 6     | FIC | 0.244                                      | 2.25 × 10 <sup>-3</sup>                        | 108                                        | 120             | 99.7/0                                       | 13.4                                             | 29.5                                        | 1.16                  | 0.451                 |
| 7     | AIC | 0.255                                      | 3.82 × 10 <sup>-3</sup>                        | 66.8                                       | 600             | 98.2/0                                       | 5.62                                             | 10.8                                        | 1.04                  | 0.513                 |

<sup>a</sup>Conversion to polymer determined from the gravimetric yield of polymer. <sup>b</sup>Conversion to cyclotrimer determined from <sup>1</sup>H NMR spectroscopy. <sup>c</sup>*M*<sub>n,theo</sub> = MW of DPA + [M]<sub>0</sub>/[NaDPA]<sub>0</sub> × MW of M × conv to polymer/100%. <sup>d</sup>Determined from SEC-MALLS. <sup>e</sup>*f* = (*M*<sub>n,theo</sub> of polymer – MW of DPA)/(*M*<sub>n</sub> of polymer – MW of DPA).

(a) PFIC ( $M_{n,theo} = 13.4$  kDa;  $M_n = 29.5$  kDa;  $\mathcal{D} = 1.16$ )

(b) PAIC ( $M_{n,theo} = 5.62$  kDa;  $M_n = 10.8$  kDa;  $\mathcal{D} = 1.04$ )

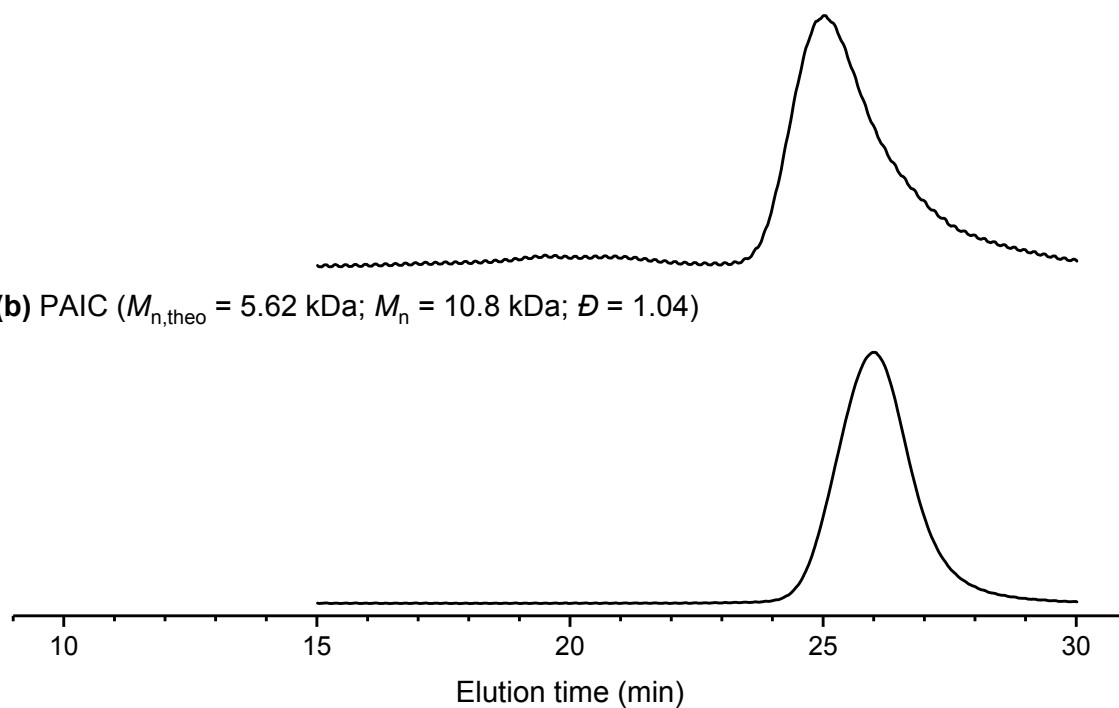

**Figure S9.** SEC-dRI traces of final (a) PFIC and (b) PAIC from the anionic polymerization of AIC and FIC initiated by NaDPA in the presence of NaBPh<sub>4</sub> ( $[\text{NaBPh}_4]_0/[\text{NaDPA}]_0 = 5$ ) in THF at  $-98$  °C under  $10^{-6}$  Torr.

**Table S5. Final Results of the Anionic Polymerization of HIC Initiated by NaDPA in the Presence of NaBPh<sub>4</sub> ([NaBPh<sub>4</sub>]<sub>0</sub>/[NaDPA]<sub>0</sub> = 5) in THF at -78 °C under 10<sup>-6</sup> Torr**

| entry | [HIC] <sub>0</sub><br>(mol L <sup>-1</sup> ) | [NaDPA] <sub>0</sub><br>(mol L <sup>-1</sup> ) | [HIC] <sub>0</sub> /<br>[NaDPA] <sub>0</sub> | <i>t</i><br>(s) | conv/%<br>(P <sup>a</sup> /CT <sup>b</sup> ) | <i>M</i> <sub>n,theo</sub> <sup>c</sup><br>(kDa) | <i>M</i> <sub>n</sub> <sup>d</sup><br>(kDa) | <i>D</i> <sup>d</sup> | <i>f</i> <sup>e</sup> |
|-------|----------------------------------------------|------------------------------------------------|----------------------------------------------|-----------------|----------------------------------------------|--------------------------------------------------|---------------------------------------------|-----------------------|-----------------------|
| S34   | 0.575                                        | 25.4 × 10 <sup>-3</sup>                        | 22.6                                         | 60              | 93.8/3.1                                     | 2.87                                             | 3.68                                        | 1.11                  | 0.769                 |
| S35   | 0.513                                        | 11.3 × 10 <sup>-3</sup>                        | 45.4                                         | 120             | 91.6/6.2                                     | 5.46                                             | 6.40                                        | 1.04                  | 0.849                 |
| S36   | 0.545                                        | 5.27 × 10 <sup>-3</sup>                        | 103                                          | 120             | 91.5/2.0                                     | 12.2                                             | 13.5                                        | 1.02                  | 0.902                 |
| S47   | 0.500                                        | 2.36 × 10 <sup>-3</sup>                        | 212                                          | 240             | 91.1/3.0                                     | 24.7                                             | 24.7                                        | 1.03                  | 1.00                  |

<sup>a</sup>Conversion to polymer determined from the gravimetric yield of PHIC. <sup>b</sup>Conversion to cyclotrimer determined from <sup>1</sup>H NMR spectroscopy. <sup>c</sup>*M*<sub>n,theo</sub> = MW of DPA + [HIC]<sub>0</sub>/[NaDPA]<sub>0</sub> × MW of HIC × conv to polymer/100%. <sup>d</sup>Determined from SEC-MALLS. <sup>e</sup>*f* = (*M*<sub>n,theo</sub> of polymer – MW of DPA)/(*M*<sub>n</sub> of polymer – MW of DPA).

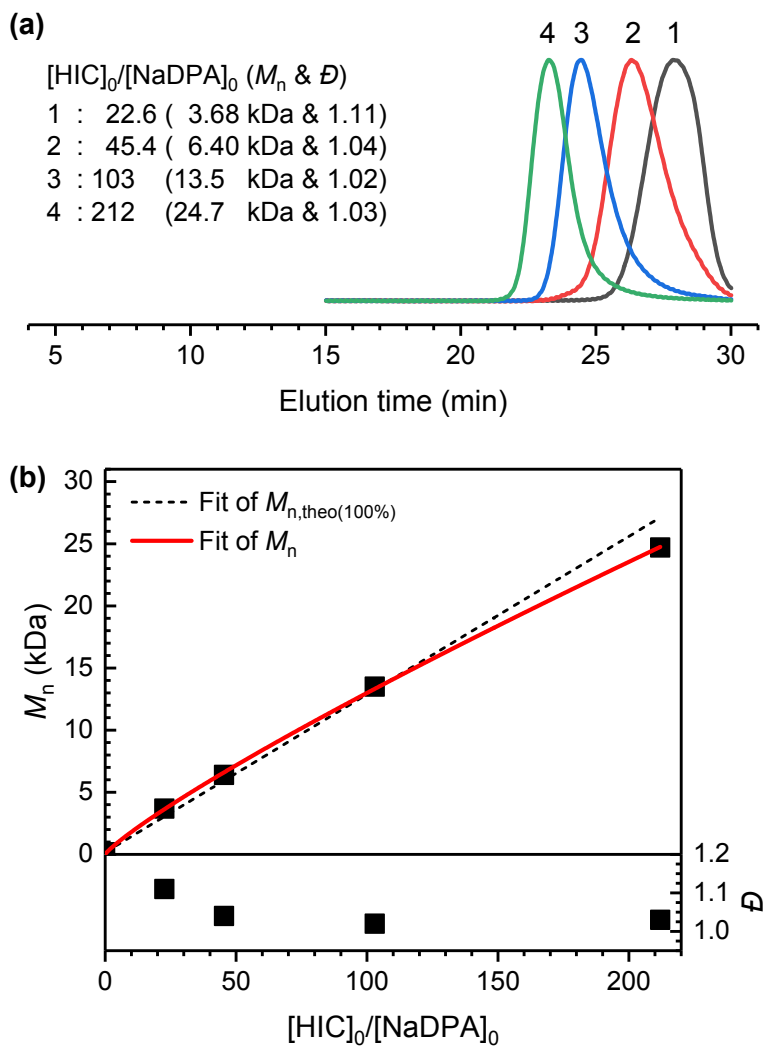

**Figure S10.** (a) SEC-dRI traces and (b) plots of  $M_n$  and  $\bar{D}$  versus  $[HIC]_0/[NaDPA]_0$  for final PHICs yielded from the anionic polymerization of HIC initiated by NaDPA ( $[NaDPA]_0 = 25.4\text{--}2.36 \times 10^{-3} \text{ mol L}^{-1}$ ) in the presence of NaBPh<sub>4</sub> ( $[NaBPh_4]_0/[NaDPA]_0 = 5$ ) in THF at  $-78 \text{ }^\circ\text{C}$  under  $10^{-6}$  Torr.

### S3. References

- (S1) Chae, C.-G.; Bak, I.-G.; Lee, J.-S. Propagation-Inspired Initiation of an Aliphatic Sodium Amidate for the Living Anionic Homo- and Copolymerization of Isocyanates: Access to the Multiblocky Sequence Distribution of Binary Comonomers. *Macromolecules* **2018**, *51*, 10083–10094.
- (S2) Jang Y. H.; Lansac, Y.; Kim, J.-K.; Yoo, H.-S.; Chae, C.-G.; Choi, C. H.; Samal, S.; Lee, J.-S. Dual Function of a Living Polymerization Initiator through the Formation of a Chain-End-Protecting Cluster: Density Functional Theory Calculation. *Phys. Chem. Chem. Phys.* **2014**, *16*, 24929–24935.
